# Supplementary material for: Multi-generation OH oxidation as a source for highly oxygenatedorganic molecules from aromatics
Source: Copernicus journal article supplement (doi:10.5194/acp-2019-582), 2019-06-26
Supplement: Supplementary file 1 [file acp-2019-582-supplement.pdf]

Tables in Supplement present the spectra shown in Fig. 3 and 5 and lists the molecular composition as well as exact mass of the individual oxidation products as identified in CI-API-TOF spectra. If two compounds overlapped on the same integer mass, the value was assigned to the dominant peak, while the value for the other one was set to “n/a”.

**Table S1.** Products of benzene oxidation as identified in CI-API-TOF spectra from the flow reactor. Data corresponds to Fig. 3a in the main text. All ions are negatively charged and include the reagent ion,  $\text{NO}_3^-$ . m/z is mass-to-charge ratio and  $f_{\text{total}}$  is fraction of total signal.

| C | H | O  | N | m/z, Th  | $f_{\text{total}} \times 10^{-4}$ | C  | H  | O  | N | m/z, Th  | $f_{\text{total}} \times 10^{-4}$ |
|---|---|----|---|----------|-----------------------------------|----|----|----|---|----------|-----------------------------------|
| 6 | 6 | 7  | 1 | 204.0150 | 9.4                               | 6  | 6  | 13 | 1 | 299.9845 | 8.9                               |
| 6 | 7 | 7  | 1 | 205.0228 | 3.1                               | 6  | 7  | 13 | 1 | 300.9923 | 2.7                               |
| 6 | 8 | 7  | 1 | 206.0306 | 22.5                              | 6  | 8  | 13 | 1 | 302.0001 | 15.6                              |
| 5 | 6 | 8  | 1 | 208.0099 | 3.1                               | 12 | 12 | 9  | 1 | 314.0518 | 3.2                               |
| 6 | 6 | 8  | 1 | 220.0099 | 6.3                               | 6  | 6  | 14 | 1 | 315.9794 | n/a                               |
| 6 | 7 | 8  | 1 | 221.0177 | 0.8                               | 12 | 14 | 9  | 1 | 316.0674 | 2.5                               |
| 6 | 8 | 8  | 1 | 222.0255 | 55.9                              | 6  | 7  | 14 | 1 | 316.9872 | 47.8                              |
| 5 | 5 | 9  | 1 | 222.9970 | 5.5                               | 6  | 8  | 14 | 1 | 317.9950 | 28.5                              |
| 5 | 6 | 9  | 1 | 224.0048 | 9.2                               | 12 | 12 | 10 | 1 | 330.0467 | 1.1                               |
| 5 | 7 | 9  | 1 | 225.0126 | 1.6                               | 6  | 6  | 15 | 1 | 331.9743 | 3.2                               |
| 6 | 6 | 9  | 1 | 236.0048 | 5.4                               | 12 | 14 | 10 | 1 | 332.0623 | n/a                               |
| 6 | 7 | 9  | 1 | 237.0126 | 1.2                               | 6  | 7  | 15 | 1 | 332.9821 | 0.8                               |
| 6 | 8 | 9  | 1 | 238.0205 | 10.2                              | 6  | 8  | 15 | 1 | 333.9899 | 2.9                               |
| 5 | 6 | 10 | 1 | 239.9997 | 38.3                              | 12 | 14 | 11 | 1 | 348.0572 | 89.1                              |
| 5 | 7 | 10 | 1 | 241.0075 | 4.9                               | 6  | 8  | 16 | 1 | 349.9849 | 5.6                               |
| 5 | 8 | 10 | 1 | 242.0154 | 7.9                               | 11 | 14 | 12 | 1 | 352.0522 | 6.9                               |
| 6 | 6 | 10 | 1 | 251.9997 | 1.4                               | 10 | 12 | 13 | 1 | 354.0314 | 4.6                               |
| 6 | 7 | 10 | 1 | 253.0075 | 2.6                               | 12 | 12 | 12 | 1 | 362.0365 | 1.0                               |
| 6 | 8 | 10 | 1 | 254.0154 | 17.8                              | 12 | 14 | 12 | 1 | 364.0522 | 5.5                               |
| 5 | 6 | 11 | 1 | 255.9946 | 91.1                              | 11 | 14 | 13 | 1 | 368.0471 | 4.0                               |
| 5 | 7 | 11 | 1 | 257.0025 | 7.5                               | 12 | 12 | 13 | 1 | 378.0314 | 4.6                               |
| 6 | 6 | 11 | 1 | 267.9946 | 4.7                               | 12 | 14 | 13 | 1 | 380.0471 | 24.6                              |
| 6 | 7 | 11 | 1 | 269.0025 | 0.7                               | 11 | 14 | 14 | 1 | 384.0420 | 2.5                               |
| 6 | 8 | 11 | 1 | 270.0103 | 68.4                              | 12 | 14 | 14 | 1 | 396.0420 | 2.0                               |
| 5 | 6 | 12 | 1 | 271.9896 | 7.4                               | 11 | 12 | 15 | 1 | 398.0212 | 0.8                               |
| 5 | 7 | 12 | 1 | 272.9974 | 3.4                               | 11 | 14 | 15 | 1 | 400.0369 | 0.9                               |
| 5 | 8 | 12 | 1 | 274.0052 | 2.8                               | 12 | 12 | 15 | 1 | 410.0212 | 0.7                               |
| 6 | 6 | 12 | 1 | 283.9896 | 2.9                               | 12 | 14 | 15 | 1 | 412.0369 | 65.4                              |
| 6 | 7 | 12 | 1 | 284.9974 | 51.4                              | 11 | 14 | 16 | 1 | 416.0318 | 2.3                               |
| 6 | 8 | 12 | 1 | 286.0052 | 87.5                              | 12 | 14 | 16 | 1 | 428.0318 | 2.0                               |
| 5 | 8 | 13 | 1 | 290.0001 | 3.2                               | 12 | 14 | 17 | 1 | 444.0267 | 16.5                              |

**Table S2.** Products of toluene oxidation as identified in CI-API-TOF spectra from the flow reactor. Data corresponds to Fig. 3b in the main text. All ions are negatively charged and include the reagent ion,  $\text{NO}_3^-$ .  $m/z$  is mass-to-charge ratio and  $f_{\text{total}}$  is fraction of total signal.

| C | H  | O  | N | $m/z$ , Th | $f_{\text{total}} \times 10^{-4}$ | C  | H  | O  | N | $m/z$ , Th | $f_{\text{total}} \times 10^{-4}$ |
|---|----|----|---|------------|-----------------------------------|----|----|----|---|------------|-----------------------------------|
| 7 | 8  | 5  | 1 | 186.0408   | 5.1                               | 11 | 14 | 10 | 1 | 320.0623   | 9.3                               |
| 7 | 8  | 6  | 1 | 202.0357   | 212.2                             | 13 | 14 | 9  | 1 | 328.0674   | 45.2                              |
| 6 | 6  | 7  | 1 | 204.0150   | 25.2                              | 13 | 16 | 9  | 1 | 330.0831   | 10.1                              |
| 7 | 10 | 6  | 1 | 204.0514   | n/a                               | 12 | 14 | 10 | 1 | 332.0623   | 73.0                              |
| 6 | 8  | 7  | 1 | 206.0306   | 19.2                              | 12 | 16 | 10 | 1 | 334.0780   | 3.2                               |
| 5 | 8  | 8  | 1 | 210.0255   | 5.7                               | 11 | 14 | 11 | 1 | 336.0572   | 4.4                               |
| 7 | 8  | 7  | 1 | 218.0306   | 80.4                              | 14 | 16 | 9  | 1 | 342.0831   | 49.7                              |
| 7 | 9  | 7  | 1 | 219.0385   | 18.8                              | 14 | 18 | 9  | 1 | 344.0987   | 29.5                              |
| 6 | 6  | 8  | 1 | 220.0099   | n/a                               | 14 | 20 | 9  | 1 | 346.1144   | 77.9                              |
| 7 | 10 | 7  | 1 | 220.0463   | 139.3                             | 12 | 14 | 11 | 1 | 348.0572   | 39.9                              |
| 6 | 8  | 8  | 1 | 222.0255   | 14.8                              | 11 | 14 | 12 | 1 | 352.0522   | 3.5                               |
| 7 | 12 | 7  | 1 | 222.0619   | n/a                               | 14 | 14 | 10 | 1 | 356.0623   | 19.6                              |
| 5 | 6  | 9  | 1 | 224.0048   | 10.9                              | 14 | 16 | 10 | 1 | 358.0780   | 45.8                              |
| 6 | 10 | 8  | 1 | 224.0412   | n/a                               | 14 | 18 | 10 | 1 | 360.0936   | 29.4                              |
| 7 | 8  | 8  | 1 | 234.0255   | 171.5                             | 13 | 16 | 11 | 1 | 362.0729   | 11.5                              |
| 6 | 6  | 9  | 1 | 236.0048   | n/a                               | 13 | 18 | 11 | 1 | 364.0885   | 13.9                              |
| 7 | 10 | 8  | 1 | 236.0412   | 741.2                             | 11 | 14 | 13 | 1 | 368.0471   | 15.0                              |
| 6 | 8  | 9  | 1 | 238.0205   | 42.6                              | 14 | 16 | 11 | 1 | 374.0729   | 276.7                             |
| 7 | 12 | 8  | 1 | 238.0568   | n/a                               | 14 | 18 | 11 | 1 | 376.0885   | 349.0                             |
| 5 | 6  | 10 | 1 | 239.9997   | n/a                               | 13 | 16 | 12 | 1 | 378.0678   | 36.7                              |
| 6 | 10 | 9  | 1 | 240.0361   | 17.7                              | 13 | 18 | 12 | 1 | 380.0834   | 12.8                              |
| 5 | 7  | 10 | 1 | 241.0075   | 10.5                              | 14 | 14 | 12 | 1 | 388.0522   | 6.2                               |
| 7 | 8  | 9  | 1 | 250.0205   | 52.2                              | 14 | 16 | 12 | 1 | 390.0678   | 66.5                              |
| 6 | 6  | 10 | 1 | 251.9997   | n/a                               | 14 | 18 | 12 | 1 | 392.0834   | 80.2                              |
| 7 | 10 | 9  | 1 | 252.0361   | 161.1                             | 13 | 16 | 13 | 1 | 394.0627   | 12.9                              |
| 6 | 8  | 10 | 1 | 254.0154   | 43.4                              | 14 | 20 | 12 | 1 | 394.0991   | n/a                               |
| 7 | 12 | 9  | 1 | 254.0518   | n/a                               | 13 | 18 | 13 | 1 | 396.0784   | 7.7                               |
| 5 | 6  | 11 | 1 | 255.9946   | n/a                               | 14 | 14 | 13 | 1 | 404.0471   | 0.8                               |
| 6 | 10 | 10 | 1 | 256.0310   | 19.1                              | 14 | 16 | 13 | 1 | 406.0627   | 61.6                              |
| 7 | 8  | 10 | 1 | 266.0154   | 66.5                              | 14 | 18 | 13 | 1 | 408.0784   | 42.7                              |
| 6 | 6  | 11 | 1 | 267.9946   | n/a                               | 14 | 20 | 13 | 1 | 410.0940   | 17.8                              |
| 7 | 10 | 10 | 1 | 268.0310   | 129.9                             | 14 | 16 | 14 | 1 | 422.0576   | 21.6                              |
| 6 | 8  | 11 | 1 | 270.0103   | 41.8                              | 14 | 18 | 14 | 1 | 424.0733   | 29.5                              |
| 7 | 12 | 10 | 1 | 270.0467   | n/a                               | 14 | 20 | 14 | 1 | 426.0889   | 1.4                               |
| 7 | 8  | 11 | 1 | 282.0103   | 52.9                              | 14 | 16 | 15 | 1 | 438.0526   | 8.2                               |
| 6 | 6  | 12 | 1 | 283.9896   | n/a                               | 14 | 18 | 15 | 1 | 440.0682   | 62.0                              |
| 7 | 10 | 11 | 1 | 284.0259   | 140.4                             | 14 | 20 | 15 | 1 | 442.0838   | 4.6                               |
| 6 | 8  | 12 | 1 | 286.0052   | 24.1                              | 14 | 16 | 16 | 1 | 454.0475   | 5.4                               |
| 7 | 12 | 11 | 1 | 286.0416   | n/a                               | 14 | 18 | 16 | 1 | 456.0631   | 4.4                               |
| 7 | 8  | 12 | 1 | 298.0052   | 26.2                              | 14 | 16 | 17 | 1 | 470.0424   | 3.1                               |
| 7 | 9  | 12 | 1 | 299.0130   | 35.6                              | 14 | 18 | 17 | 1 | 472.0580   | 3.1                               |
| 7 | 10 | 12 | 1 | 300.0208   | 87.5                              | 14 | 16 | 18 | 1 | 486.0373   | 0.9                               |
| 7 | 8  | 13 | 1 | 314.0001   | 26.6                              |    |    |    |   |            |                                   |

**Table S3.** Products of naphthalene oxidation as identified in CI-API-TOF spectra from the flow reactor. Data corresponds to Fig. 3c in the main text. All ions are negatively charged and include the reagent ion,  $\text{NO}_3^-$ . m/z is mass-to-charge ratio and  $f_{\text{total}}$  is fraction of total signal.

| C  | H  | O  | N | m/z, Th  | $f_{\text{total}} \times 10^{-4}$ | C  | H  | O  | N | m/z, Th  | $f_{\text{total}} \times 10^{-4}$ |
|----|----|----|---|----------|-----------------------------------|----|----|----|---|----------|-----------------------------------|
| 10 | 10 | 7  | 1 | 256.0463 | 80.7                              | 20 | 18 | 8  | 1 | 400.1038 | 14.9                              |
| 10 | 8  | 8  | 1 | 270.0255 | 4.7                               | 20 | 16 | 9  | 1 | 414.0831 | 3.7                               |
| 10 | 10 | 8  | 1 | 272.0412 | 39.5                              | 20 | 18 | 9  | 1 | 416.0987 | 70.7                              |
| 10 | 12 | 8  | 1 | 274.0569 | 22.3                              | 20 | 20 | 9  | 1 | 418.1144 | 41.1                              |
| 10 | 8  | 9  | 1 | 286.0205 | 6.3                               | 20 | 16 | 10 | 1 | 430.0780 | 5.6                               |
| 10 | 10 | 9  | 1 | 288.0361 | 64.9                              | 20 | 18 | 10 | 1 | 432.0936 | 23.2                              |
| 10 | 11 | 9  | 1 | 289.0439 | 26.4                              | 20 | 20 | 10 | 1 | 434.1093 | 133.5                             |
| 10 | 12 | 9  | 1 | 290.0518 | 182.8                             | 20 | 16 | 11 | 1 | 446.0729 | 4.0                               |
| 10 | 8  | 10 | 1 | 302.0154 | 4.1                               | 20 | 17 | 11 | 1 | 447.0807 | 4.1                               |
| 10 | 9  | 10 | 1 | 303.0232 | 0.9                               | 20 | 18 | 11 | 1 | 448.0885 | 23.2                              |
| 10 | 10 | 10 | 1 | 304.0310 | 46.2                              | 20 | 20 | 11 | 1 | 450.1042 | 93.7                              |
| 10 | 11 | 10 | 1 | 305.0389 | 10.9                              | 20 | 21 | 11 | 1 | 451.1120 | 85.4                              |
| 10 | 12 | 10 | 1 | 306.0467 | 143.1                             | 20 | 22 | 11 | 1 | 452.1198 | 28.3                              |
| 10 | 14 | 10 | 1 | 308.0623 | 18.8                              | 20 | 16 | 12 | 1 | 462.0678 | 3.7                               |
| 10 | 8  | 11 | 1 | 318.0103 | 3.1                               | 20 | 18 | 12 | 1 | 464.0834 | 14.8                              |
| 10 | 9  | 11 | 1 | 319.0181 | 1.6                               | 20 | 20 | 12 | 1 | 466.0991 | 76.2                              |
| 10 | 10 | 11 | 1 | 320.0259 | 28.7                              | 20 | 22 | 12 | 1 | 468.1148 | 31.5                              |
| 10 | 12 | 11 | 1 | 322.0416 | 93.5                              | 20 | 16 | 13 | 1 | 478.0627 | 1.5                               |
| 10 | 14 | 11 | 1 | 324.0572 | 47.5                              | 20 | 18 | 13 | 1 | 480.0784 | 10.6                              |
| 10 | 15 | 11 | 1 | 325.0651 | 17.0                              | 20 | 20 | 13 | 1 | 482.0940 | 47.5                              |
| 10 | 8  | 12 | 1 | 334.0052 | 3.2                               | 20 | 21 | 13 | 1 | 483.1018 | 30.6                              |
| 10 | 9  | 12 | 1 | 335.0130 | 2.5                               | 20 | 22 | 13 | 1 | 484.1097 | 39.9                              |
| 10 | 10 | 12 | 1 | 336.0208 | 16.2                              | 20 | 23 | 13 | 1 | 485.1175 | 21.8                              |
| 10 | 11 | 12 | 1 | 337.0287 | 7.1                               | 20 | 24 | 13 | 1 | 486.1253 | 8.1                               |
| 10 | 12 | 12 | 1 | 338.0365 | 50.7                              | 20 | 16 | 14 | 1 | 494.0576 | 0.6                               |
| 10 | 13 | 12 | 1 | 339.0443 | 21.0                              | 20 | 18 | 14 | 1 | 496.0733 | 7.4                               |
| 10 | 14 | 12 | 1 | 340.0522 | 42.0                              | 20 | 20 | 14 | 1 | 498.0889 | 20.9                              |
| 10 | 15 | 12 | 1 | 341.0600 | 10.7                              | 20 | 21 | 14 | 1 | 499.0967 | 10.3                              |
| 10 | 10 | 13 | 1 | 352.0158 | 11.9                              | 20 | 22 | 14 | 1 | 500.1046 | 28.0                              |
| 10 | 12 | 13 | 1 | 354.0314 | 24.4                              | 20 | 23 | 14 | 1 | 501.1124 | 36.5                              |
| 10 | 13 | 13 | 1 | 355.0393 | 7.1                               | 20 | 24 | 14 | 1 | 502.1202 | 11.5                              |
| 10 | 14 | 13 | 1 | 356.0471 | 20.8                              | 20 | 18 | 15 | 1 | 512.0682 | 4.6                               |
| 10 | 15 | 13 | 1 | 357.0549 | 8.2                               | 20 | 20 | 15 | 1 | 514.0839 | 16.1                              |
| 10 | 10 | 14 | 1 | 368.0107 | 5.7                               | 20 | 22 | 15 | 1 | 516.0995 | 17.1                              |
| 20 | 18 | 6  | 1 | 368.1140 | n/a                               | 20 | 23 | 15 | 1 | 517.1073 | 15.8                              |
| 10 | 12 | 14 | 1 | 370.0263 | 13.0                              | 20 | 24 | 15 | 1 | 518.1151 | 12.8                              |
| 10 | 13 | 14 | 1 | 371.0342 | 4.0                               | 20 | 20 | 16 | 1 | 530.0787 | 7.1                               |
| 10 | 14 | 14 | 1 | 372.0420 | 9.4                               | 20 | 22 | 16 | 1 | 532.0944 | 9.4                               |
| 10 | 15 | 14 | 1 | 373.0498 | 4.0                               | 20 | 20 | 17 | 1 | 546.0737 | 4.6                               |
| 20 | 18 | 7  | 1 | 384.1089 | 102.1                             | 20 | 22 | 17 | 1 | 548.0893 | 4.7                               |

**Table S4.** Peaks identified in JPAC. Non-nitrogen containing HOM were included in HOM yield calculation, with exception of those marked with \* in m/z column. All ions are negatively charged and include the reagent ion. In non-nitrogen containing HOM, N content of 1 indicates that the HOM is likely charged by  $\text{NO}_3^-$ , while if N=0, the HOM are detected as de-protonated species. Among nitrogen-containing molecules, N=1 likely refers to deprotonated species, while N=2 likely means that the molecule is charged by  $\text{NO}_3^-$ . When N=3, it is possible that the molecule is charged by nitric acid dimer,  $\text{HNO}_3\text{-NO}_3^-$ , or has two nitrogens within a molecule and is charged by  $\text{NO}_3^-$ . m/z is mass-to-charge ratio and  $f_{\text{total}}$  is fraction of total signal.

| Non-nitrogen containing HOM |    |    |   |           |                                              |                                              |                                              |                                              |
|-----------------------------|----|----|---|-----------|----------------------------------------------|----------------------------------------------|----------------------------------------------|----------------------------------------------|
| C                           | H  | O  | N | m/z, Th   | $f_{\text{total}} \times 10^{-6}$<br>panel a | $f_{\text{total}} \times 10^{-6}$<br>panel b | $f_{\text{total}} \times 10^{-6}$<br>panel c | $f_{\text{total}} \times 10^{-6}$<br>panel d |
| 5                           | 7  | 6  | 0 | 163.0248  | 8                                            | 61                                           | 13                                           | 29                                           |
| 6                           | 5  | 6  | 0 | 173.0092  | 37                                           | 167                                          | 41                                           | 74                                           |
| 6                           | 5  | 8  | 0 | 204.9990* | 17                                           | 87                                           | 33                                           | n/a                                          |
| 6                           | 7  | 8  | 0 | 207.0146  | 11                                           | 55                                           | 43                                           | 25                                           |
| 6                           | 5  | 9  | 0 | 220.9939* | 14                                           | 39                                           | 44                                           | n/a                                          |
| 5                           | 4  | 9  | 1 | 221.9892  | 74                                           | 328                                          | 104                                          | 59                                           |
| 5                           | 6  | 9  | 1 | 224.0048  | 47                                           | 230                                          | 43                                           | 46                                           |
| 6                           | 4  | 9  | 1 | 233.9892  | 20                                           | 189                                          | 53                                           | 27                                           |
| 6                           | 6  | 9  | 1 | 236.0048  | 103                                          | 429                                          | 360                                          | 142                                          |
| 6                           | 7  | 9  | 1 | 237.0126  | 30                                           | 58                                           | 88                                           | 41                                           |
| 5                           | 6  | 10 | 1 | 239.9997  | 177                                          | 449                                          | 122                                          | 167                                          |
| 5                           | 7  | 10 | 1 | 241.0075  | 35                                           | 81                                           | 56                                           | 109                                          |
| 6                           | 4  | 10 | 1 | 249.9841  | 19                                           | 302                                          | 41                                           | 51                                           |
| 6                           | 6  | 10 | 1 | 251.9997  | 68                                           | 852                                          | 284                                          | 102                                          |
| 6                           | 8  | 10 | 1 | 254.0154  | 130                                          | 857                                          | 236                                          | 98                                           |
| 5                           | 5  | 11 | 1 | 254.9868  | 20                                           | 306                                          | 41                                           | 64                                           |
| 5                           | 6  | 11 | 1 | 255.9946  | 1135                                         | 585                                          | 93                                           | 403                                          |
| 6                           | 4  | 11 | 1 | 265.9790  | 22                                           | 175                                          | 45                                           | 62                                           |
| 6                           | 5  | 11 | 1 | 266.9868* | 51                                           | 44                                           | 68                                           | n/a                                          |
| 6                           | 6  | 11 | 1 | 267.9946  | 107                                          | 901                                          | 144                                          | 154                                          |
| 6                           | 7  | 11 | 1 | 269.0025  | 42                                           | 271                                          | 80                                           | 67                                           |
| 6                           | 8  | 11 | 1 | 270.0103  | 363                                          | 984                                          | 285                                          | 201                                          |
| 6                           | 6  | 12 | 1 | 283.9895  | 124                                          | 577                                          | 220                                          | 607                                          |
| 6                           | 7  | 12 | 1 | 284.9974* | 153                                          | 215                                          | 66                                           | 132                                          |
| 6                           | 8  | 12 | 1 | 286.0052  | 265                                          | 749                                          | 442                                          | 171                                          |
| 6                           | 9  | 12 | 1 | 287.0130* | 58                                           | 187                                          | 67                                           | n/a                                          |
| 6                           | 10 | 12 | 1 | 288.0208  | 55                                           | 297                                          | 69                                           | n/a                                          |
| 5                           | 8  | 13 | 1 | 290.0001  | 39                                           | 107                                          | 25                                           | 31                                           |
| 6                           | 6  | 13 | 1 | 299.9845  | 277                                          | 342                                          | 140                                          | 123                                          |
| 6                           | 8  | 13 | 1 | 302.0001  | 718                                          | 474                                          | 393                                          | 190                                          |
| 5                           | 7  | 14 | 1 | 304.9872  | 31                                           | 85                                           | 45                                           | 41                                           |
| 5                           | 8  | 14 | 1 | 305.9950  | 28                                           | 65                                           | 28                                           | 19                                           |
| 6                           | 8  | 14 | 1 | 317.9950  | 374                                          | 251                                          | 83                                           | 111                                          |
| 6                           | 9  | 14 | 1 | 319.0029* | 292                                          | 210                                          | 36                                           | n/a                                          |
| 6                           | 10 | 14 | 1 | 320.0107  | 78                                           | 73                                           | 241                                          | 62                                           |
| 10                          | 8  | 12 | 1 | 334.0052  | 110                                          | 180                                          | 81                                           | 55                                           |

**Table S4.** Continued.

| <b>C</b> | <b>H</b> | <b>O</b> | <b>N</b> | <b>m/z, Th</b> | <b>f<sub>total</sub>x10<sup>-6</sup><br/>panel a</b> | <b>f<sub>total</sub>x10<sup>-6</sup><br/>panel b</b> | <b>f<sub>total</sub>x10<sup>-6</sup><br/>panel c</b> | <b>f<sub>total</sub>x10<sup>-6</sup><br/>panel d</b> |
|----------|----------|----------|----------|----------------|------------------------------------------------------|------------------------------------------------------|------------------------------------------------------|------------------------------------------------------|
| 10       | 9        | 12       | 1        | 335.0130       | 61                                                   | 206                                                  | 31                                                   | 50                                                   |
| 10       | 10       | 12       | 1        | 336.0208       | 62                                                   | 141                                                  | 107                                                  | 35                                                   |
| 12       | 12       | 11       | 1        | 346.0416*      | 58                                                   | 40                                                   | 144                                                  | n/a                                                  |
| 12       | 14       | 11       | 1        | 348.0572       | 309                                                  | 62                                                   | 78                                                   | 58                                                   |
| 11       | 14       | 12       | 1        | 352.0521       | 103                                                  | 61                                                   | 119                                                  | 22                                                   |
| 10       | 12       | 13       | 1        | 354.0314       | 47                                                   | 45                                                   | 93                                                   | 18                                                   |
| 12       | 12       | 12       | 1        | 362.0365*      | 120                                                  | 60                                                   | 264                                                  | n/a                                                  |
| 12       | 14       | 12       | 1        | 364.0521       | 147                                                  | 70                                                   | 170                                                  | 64                                                   |
| 12       | 16       | 12       | 1        | 366.0678       | 53                                                   | 53                                                   | 48                                                   | 23                                                   |
| 11       | 14       | 13       | 1        | 368.0471       | 44                                                   | 63                                                   | 68                                                   | 18                                                   |
| 10       | 12       | 14       | 1        | 370.0263       | 27                                                   | 50                                                   | 42                                                   | 18                                                   |
| 12       | 12       | 13       | 1        | 378.0314       | 90                                                   | 95                                                   | 316                                                  | 53                                                   |
| 12       | 14       | 13       | 1        | 380.0471       | 143                                                  | 119                                                  | 178                                                  | 33                                                   |
| 12       | 16       | 13       | 1        | 382.0627       | 58                                                   | 68                                                   | 49                                                   | 22                                                   |
| 11       | 14       | 14       | 1        | 384.0420       | 52                                                   | 62                                                   | 53                                                   | 19                                                   |
| 10       | 12       | 15       | 1        | 386.0212       | 34                                                   | 50                                                   | 30                                                   | 24                                                   |
| 12       | 10       | 14       | 1        | 392.0107       | 15                                                   | 25                                                   | 33                                                   | 14                                                   |
| 12       | 12       | 14       | 1        | 394.0263*      | 71                                                   | 90                                                   | 269                                                  | n/a                                                  |
| 12       | 14       | 14       | 1        | 396.0420       | 115                                                  | 134                                                  | 132                                                  | 34                                                   |
| 12       | 16       | 14       | 1        | 398.0576       | 97                                                   | 124                                                  | 62                                                   | 23                                                   |
| 11       | 14       | 15       | 1        | 400.0369       | 40                                                   | 50                                                   | 20                                                   | 16                                                   |
| 12       | 10       | 15       | 1        | 408.0056       | 8                                                    | 29                                                   | 23                                                   | 13                                                   |
| 12       | 12       | 15       | 1        | 410.0212       | 149                                                  | 95                                                   | 297                                                  | 34                                                   |
| 12       | 14       | 15       | 1        | 412.0369       | 166                                                  | 123                                                  | 78                                                   | 27                                                   |
| 11       | 12       | 16       | 1        | 414.0162       | 51                                                   | 81                                                   | 29                                                   | 17                                                   |
| 11       | 14       | 16       | 1        | 416.0318       | 34                                                   | 46                                                   | 6                                                    | 14                                                   |
| 12       | 10       | 16       | 1        | 424.0005       | 11                                                   | 28                                                   | 25                                                   | 12                                                   |
| 12       | 12       | 16       | 1        | 426.0162*      | 95                                                   | 70                                                   | 90                                                   | n/a                                                  |
| 12       | 14       | 16       | 1        | 428.0318       | 126                                                  | 108                                                  | 102                                                  | 29                                                   |
| 12       | 16       | 16       | 1        | 430.0475       | 36                                                   | 66                                                   | 18                                                   | 15                                                   |
| 11       | 14       | 17       | 1        | 432.0267       | 32                                                   | 38                                                   | 13                                                   | 7                                                    |
| 12       | 12       | 17       | 1        | 442.0111       | 36                                                   | 54                                                   | 42                                                   | 15                                                   |
| 12       | 14       | 17       | 1        | 444.0267       | 338                                                  | 81                                                   | 51                                                   | 20                                                   |
| 12       | 16       | 17       | 1        | 446.0424       | 34                                                   | 46                                                   | 16                                                   | 16                                                   |
| 12       | 12       | 18       | 1        | 458.0060       | 21                                                   | 38                                                   | 24                                                   | 8                                                    |
| 12       | 14       | 18       | 1        | 460.0216       | 44                                                   | 48                                                   | 23                                                   | 13                                                   |
| 12       | 16       | 18       | 1        | 462.0373       | 24                                                   | 30                                                   | 28                                                   | 7                                                    |
| 12       | 12       | 19       | 1        | 474.0009       | 10                                                   | 20                                                   | 4                                                    | 3                                                    |
| 12       | 14       | 19       | 1        | 476.0166       | 31                                                   | 27                                                   | 21                                                   | 9                                                    |
| 12       | 16       | 19       | 1        | 478.0322       | 16                                                   | 18                                                   | 25                                                   | 7                                                    |
| 12       | 16       | 20       | 1        | 494.0271       | 11                                                   | 14                                                   | 13                                                   | 2                                                    |
| 12       | 14       | 21       | 1        | 508.0064       | 9                                                    | 8                                                    | 10                                                   | 3                                                    |
| 12       | 16       | 21       | 1        | 510.0220       | 4                                                    | 9                                                    | 7                                                    | 4                                                    |

Table S4. Continued.

| Nitrogen-containing molecules |   |    |   |             |                                              |                                                                                    |
|-------------------------------|---|----|---|-------------|----------------------------------------------|------------------------------------------------------------------------------------|
| C                             | H | O  | N | m/z, Th     | $f_{\text{total}} \times 10^{-6}$<br>panel d | Likely compound                                                                    |
| 6                             | 4 | 3  | 1 | 138.0196666 | 101.6                                        | deprotonated nitrophenol                                                           |
| 6                             | 4 | 4  | 1 | 154.0145812 | 352.7                                        | depritonated nitrocatechol                                                         |
| 6                             | 5 | 6  | 2 | 201.0153095 | 673.1                                        | nitrophenol with NO <sub>3</sub> <sup>-</sup>                                      |
| 5                             | 5 | 7  | 2 | 205.0102241 | 50.1                                         |                                                                                    |
| 6                             | 5 | 7  | 2 | 217.0102241 | 307.1                                        | nitrocatechol with NO <sub>3</sub> <sup>-</sup>                                    |
| 5                             | 5 | 8  | 2 | 221.0051387 | 49.2                                         |                                                                                    |
| 3                             | 5 | 10 | 2 | 228.9949679 | 22.9                                         |                                                                                    |
| 6                             | 7 | 8  | 2 | 235.0207888 | 326.3                                        |                                                                                    |
| 6                             | 5 | 9  | 2 | 249.0000533 | 178.4                                        |                                                                                    |
| 6                             | 6 | 9  | 3 | 264.0109524 | 1217.1                                       | likely nitrophenol with HNO <sub>3</sub> <sup>-</sup> NO <sub>3</sub> <sup>-</sup> |
| 6                             | 7 | 10 | 2 | 267.010618  | 82.3                                         |                                                                                    |
| 5                             | 7 | 11 | 2 | 271.0055326 | 55.8                                         |                                                                                    |
| 4                             | 5 | 12 | 2 | 272.9847972 | 62.7                                         |                                                                                    |
| 4                             | 7 | 12 | 2 | 275.0004472 | 31.5                                         |                                                                                    |
| 6                             | 6 | 10 | 3 | 280.005867  | 140.3                                        | nitrocatechol with HNO <sub>3</sub> <sup>-</sup> NO <sub>3</sub> <sup>-</sup>      |
| 6                             | 5 | 11 | 2 | 280.9898826 | 71.3                                         |                                                                                    |
| 6                             | 7 | 11 | 2 | 283.0055326 | 133.3                                        |                                                                                    |
| 5                             | 7 | 12 | 2 | 287.0004472 | 74.0                                         |                                                                                    |
| 4                             | 6 | 12 | 3 | 287.9956962 | 49.2                                         |                                                                                    |
| 6                             | 5 | 12 | 2 | 296.9847972 | 50.3                                         |                                                                                    |
| 6                             | 7 | 12 | 2 | 299.0004472 | 154.2                                        |                                                                                    |
| 5                             | 5 | 13 | 2 | 300.9797118 | n/a                                          |                                                                                    |
| 6                             | 9 | 12 | 2 | 301.0160973 | 136.1                                        |                                                                                    |
| 5                             | 7 | 13 | 2 | 302.9953619 | 100.2                                        |                                                                                    |
| 4                             | 6 | 13 | 3 | 303.9906108 | 74.3                                         |                                                                                    |
| 6                             | 8 | 12 | 3 | 314.0113463 | 67.8                                         |                                                                                    |
| 6                             | 7 | 13 | 2 | 314.9953619 | 148.9                                        |                                                                                    |
| 5                             | 7 | 14 | 2 | 318.9902765 | 117.8                                        |                                                                                    |
| 6                             | 6 | 13 | 3 | 327.9906108 | 60.3                                         |                                                                                    |
| 6                             | 5 | 14 | 2 | 328.9746264 | 40.4                                         |                                                                                    |
| 6                             | 8 | 13 | 3 | 330.0062609 | 77.6                                         |                                                                                    |
| 6                             | 7 | 14 | 2 | 330.9902765 | 195.2                                        |                                                                                    |
| 6                             | 9 | 14 | 2 | 333.0059266 | 90.1                                         |                                                                                    |
| 6                             | 4 | 14 | 3 | 341.9698754 | 36.8                                         |                                                                                    |
| 6                             | 8 | 14 | 3 | 346.0011755 | 98.7                                         |                                                                                    |
| 6                             | 7 | 15 | 2 | 346.9851911 | 171.0                                        |                                                                                    |
| 6                             | 9 | 15 | 2 | 349.0008412 | 51.0                                         |                                                                                    |
| 6                             | 8 | 15 | 3 | 361.9960901 | 85.0                                         |                                                                                    |
| 6                             | 7 | 16 | 2 | 362.9801057 | 75.1                                         |                                                                                    |
| 6                             | 8 | 17 | 3 | 393.9859194 | 71.5                                         |                                                                                    |
| 6                             | 8 | 19 | 3 | 425.9757486 | 24.8                                         |                                                                                    |
